# Supplementary material
Source: ML conference proceedings conference paper supplement (https://proceedings.neurips.cc/paper_files/paper/2022/hash/7c799b09cc40973ceaa47da50131dc63-Abstract.html)
Supplement: Supplementary file 1 [file 7c799b09cc40973ceaa47da50131dc63-Supplemental-Conference.pdf]

## Supplementary Material

### A Proof of Lemma 1

We first note that  $F_t(\mathbf{y})$  is 2-strongly convex for any  $t = 0, \dots, T$ , and Hazan and Kale [2012] have proved that for any  $\beta$ -strongly convex function  $f(\mathbf{x})$  over  $\mathcal{K}$  and any  $\mathbf{x} \in \mathcal{K}$ , it holds that

$$\frac{\beta}{2} \|\mathbf{x} - \mathbf{x}^*\|_2^2 \leq f(\mathbf{x}) - f(\mathbf{x}^*) \quad (21)$$

where  $\mathbf{x}^* = \operatorname{argmin}_{\mathbf{x} \in \mathcal{K}} f(\mathbf{x})$ .

Then, we consider the term  $A = \sum_{t=1}^T G \|\mathbf{y}_{\tau_t} - \mathbf{y}_{\tau_{t'}}\|_2$ . If  $T \leq 2d$ , we have

$$A = \sum_{t=1}^T G \|\mathbf{y}_{\tau_t} - \mathbf{y}_{\tau_{t'}}\|_2 \leq TGD \leq 2dGD \quad (22)$$

where the first inequality is due to Assumption 2. If  $T > 2d$ , we have

$$\begin{aligned} A &= \sum_{t=1}^{2d} G \|\mathbf{y}_{\tau_t} - \mathbf{y}_{\tau_{t'}}\|_2 + \sum_{t=2d+1}^T G \|\mathbf{y}_{\tau_t} - \mathbf{y}_{\tau_{t'}}\|_2 \\ &\leq 2dGD + \sum_{t=2d+1}^T G (\|\mathbf{y}_{\tau_t} - \mathbf{y}_{\tau_t}^*\|_2 + \|\mathbf{y}_{\tau_t}^* - \mathbf{y}_{\tau_{t'}}^*\|_2 + \|\mathbf{y}_{\tau_{t'}}^* - \mathbf{y}_{\tau_{t'}}\|_2). \end{aligned} \quad (23)$$

Because of (21), for any  $t \in [T+1]$ , we have

$$\|\mathbf{y}_t - \mathbf{y}_t^*\|_2 \leq \sqrt{F_{t-1}(\mathbf{y}_t) - F_{t-1}(\mathbf{y}_t^*)} \leq \sqrt{\gamma}(t+2)^{-\alpha/2} \quad (24)$$

where the last inequality is due to  $F_{t-1}(\mathbf{y}_t) - F_{t-1}(\mathbf{y}_t^*) \leq \gamma(t+2)^{-\alpha}$ .

Moreover, for any  $i \geq \tau_t$ , we have

$$\begin{aligned} \|\mathbf{y}_{\tau_t}^* - \mathbf{y}_i^*\|_2^2 &\leq F_{i-1}(\mathbf{y}_{\tau_t}^*) - F_{i-1}(\mathbf{y}_i^*) \\ &= F_{\tau_t-1}(\mathbf{y}_{\tau_t}^*) - F_{\tau_t-1}(\mathbf{y}_i^*) + \left\langle \eta \sum_{k=\tau_t}^{i-1} \mathbf{g}_{c_k}, \mathbf{y}_{\tau_t}^* - \mathbf{y}_i^* \right\rangle \\ &\leq \eta \left\| \sum_{k=\tau_t}^{i-1} \mathbf{g}_{c_k} \right\|_2 \|\mathbf{y}_{\tau_t}^* - \mathbf{y}_i^*\|_2 \\ &\leq \eta G(i - \tau_t) \|\mathbf{y}_{\tau_t}^* - \mathbf{y}_i^*\|_2 \end{aligned} \quad (25)$$

where the first inequality is still due to (21) and the last inequality is due to Assumption 1.

Because of  $t' = t + d_t - 1 \geq t$ , we have  $\tau_{t'} \geq \tau_t$ . Then, from (25), we have

$$\|\mathbf{y}_{\tau_t}^* - \mathbf{y}_{\tau_{t'}}^*\|_2 \leq \eta G(\tau_{t'} - \tau_t) = \eta G \sum_{k=t}^{t'-1} |\mathcal{F}_k|. \quad (26)$$

Then, by substituting (24) and (26) into (23), if  $T > 2d$ , we have

$$\begin{aligned} A &\leq 2dGD + \sum_{t=2d+1}^T G \left( \sqrt{\gamma}(\tau_t + 2)^{-\alpha/2} + \eta G \sum_{k=t}^{t'-1} |\mathcal{F}_k| + \sqrt{\gamma}(\tau_{t'} + 2)^{-\alpha/2} \right) \\ &\leq 2dGD + \sum_{t=2d+1}^T 2G\sqrt{\gamma}(\tau_t + 2)^{-\alpha/2} + \eta G^2 \sum_{t=2d+1}^T \sum_{k=t}^{t'-1} |\mathcal{F}_k| \\ &\leq 2dGD + \sum_{t=2d+1}^T 2G\sqrt{\gamma}(\tau_t - 1)^{-\alpha/2} + \eta G^2 \sum_{t=2d+1}^T \sum_{k=t}^{t'-1} |\mathcal{F}_k| \end{aligned} \quad (27)$$

where the second inequality is due to  $(\tau_t + 2)^{-\alpha/2} \geq (\tau_{t'} + 2)^{-\alpha/2}$  for  $\tau_t \leq \tau_{t'}$  and  $\alpha > 0$ .

To bound the second term in the right side of (27), we introduce the following lemma.

**Lemma 7** Let  $\tau_t = 1 + \sum_{i=1}^{t-1} |\mathcal{F}_i|$  for any  $t \in [T + d]$ . If  $T > 2d$ , for  $0 < \alpha \leq 1$ , we have

$$\sum_{t=2d+1}^T (\tau_t - 1)^{-\alpha/2} \leq d + \frac{2}{2-\alpha} T^{1-\alpha/2}. \quad (28)$$

For the third term in the right side of (27), if  $T > 2d$ , we have

$$\begin{aligned} \sum_{t=2d+1}^T \sum_{k=t}^{t'-1} |\mathcal{F}_k| &\leq \sum_{t=1}^T \sum_{k=t}^{t'-1} |\mathcal{F}_k| \leq \sum_{t=1}^T \sum_{k=t}^{t+d-1} |\mathcal{F}_k| = \sum_{k=0}^{d-1} \sum_{t=1+k}^{T+k} |\mathcal{F}_t| \\ &\leq \sum_{k=0}^{d-1} \sum_{t=1}^{T+d-1} |\mathcal{F}_t| = dT \end{aligned} \quad (29)$$

where the second inequality is due to

$$t' - 1 < t' = t + d_t - 1 \leq t + d - 1.$$

By substituting (28) and (29) into (27) and combining with (22), we have

$$A \leq 2dGD + 2Gd\sqrt{\gamma} + \frac{4G\sqrt{\gamma}}{2-\alpha} T^{1-\alpha/2} + \eta G^2 dT. \quad (30)$$

Then, for the term  $C = \sum_{t=s}^{T+d-1} \sum_{i=\tau_t}^{\tau_{t+1}-1} G \|\mathbf{y}_{\tau_t} - \mathbf{y}_i\|_2$ , we have

$$\begin{aligned} C &= \sum_{i=\tau_s}^{\tau_{s+1}-1} G \|\mathbf{y}_{\tau_t} - \mathbf{y}_i\|_2 + \sum_{t=s+1}^{T+d-1} \sum_{i=\tau_t}^{\tau_{t+1}-1} G \|\mathbf{y}_{\tau_t} - \mathbf{y}_i\|_2 \\ &\leq |\mathcal{F}_s|GD + \sum_{t=s+1}^{T+d-1} \sum_{i=\tau_t}^{\tau_{t+1}-1} G (\|\mathbf{y}_{\tau_t} - \mathbf{y}_{\tau_t}^*\|_2 + \|\mathbf{y}_{\tau_t}^* - \mathbf{y}_i^*\|_2 + \|\mathbf{y}_i^* - \mathbf{y}_i\|_2) \\ &\leq |\mathcal{F}_s|GD + \sum_{t=s+1}^{T+d-1} \sum_{i=\tau_t}^{\tau_{t+1}-1} G \left( \sqrt{\gamma}(\tau_t + 2)^{-\alpha/2} + \eta G(i - \tau_t) + \sqrt{\gamma}(i + 2)^{-\alpha/2} \right) \\ &\leq |\mathcal{F}_s|GD + \sum_{t=s+1}^{T+d-1} \sum_{i=\tau_t}^{\tau_{t+1}-1} 2G\sqrt{\gamma}(\tau_t + 2)^{-\alpha/2} + \eta G^2 \sum_{t=s+1}^{T+d-1} \sum_{k=0}^{\tau_{t+1}-\tau_t-1} k \\ &\leq |\mathcal{F}_s|GD + \sum_{t=s+1}^{T+d-1} \sum_{i=\tau_t}^{\tau_{t+1}-1} 2G\sqrt{\gamma}(\tau_t - 1)^{-\alpha/2} + \eta G^2 \sum_{t=s}^{T+d-1} \sum_{k=0}^{\tau_{t+1}-\tau_t-1} k \end{aligned} \quad (31)$$

where the first inequality is due to Assumption 2, the second inequality is due to (24) and (25), and the third inequality is due to  $(\tau_t + 2)^{-\alpha/2} \geq (i + 2)^{-\alpha/2}$  for  $\tau_t \leq i$  and  $\alpha > 0$ .

Moreover, for any  $t \in [T + d - 1]$  and  $k \in \mathcal{F}_t$ , since  $1 \leq d_k \leq d$ , we have

$$t - d + 1 \leq k = t - d_k + 1 \leq t$$

which implies that

$$|\mathcal{F}_t| \leq t - (t - d + 1) + 1 = d. \quad (32)$$

Then, it is easy to verify that

$$\tau_{t+1} - \tau_t - 1 < \tau_{t+1} - \tau_t = |\mathcal{F}_t| \leq d.$$

Therefore, by combining with (31), we have

$$\begin{aligned} C &\leq dGD + \sum_{t=s+1}^{T+d-1} \sum_{i=\tau_t}^{\tau_{t+1}-1} 2G\sqrt{\gamma}(\tau_t - 1)^{-\alpha/2} + \eta G^2 \sum_{t=s}^{T+d-1} \frac{|\mathcal{F}_t|^2}{2} \\ &\leq dGD + \sum_{t=s+1}^{T+d-1} \sum_{i=\tau_t}^{\tau_{t+1}-1} 2G\sqrt{\gamma}(\tau_t - 1)^{-\alpha/2} + \eta G^2 \sum_{t=s}^{T+d-1} \frac{d|\mathcal{F}_t|}{2} \\ &= dGD + \sum_{t=s+1}^{T+d-1} \sum_{i=\tau_t}^{\tau_{t+1}-1} 2G\sqrt{\gamma}(\tau_t - 1)^{-\alpha/2} + \frac{\eta G^2 dT}{2}. \end{aligned} \quad (33)$$

Furthermore, we introduce the following lemma.

**Lemma 8** Let  $\tau_t = 1 + \sum_{i=1}^{t-1} |\mathcal{F}_i|$  for any  $t \in [T + d]$  and  $s = \min \{t | t \in [T + d - 1], |\mathcal{F}_t| > 0\}$ . For  $0 < \alpha \leq 1$ , we have

$$\sum_{t=s+1}^{T+d-1} \sum_{i=\tau_t}^{\tau_{t+1}-1} (\tau_t - 1)^{-\alpha/2} \leq d + \frac{2}{2-\alpha} T^{1-\alpha/2}. \quad (34)$$

By substituting (34) into (33), we have

$$C \leq dGD + 2G\sqrt{\gamma}d + \frac{4G\sqrt{\gamma}}{2-\alpha} T^{1-\alpha/2} + \frac{\eta G^2 d T}{2} \quad (35)$$

We complete the proof by combining (30) and (35).

## B Proof of Lemma 2

At the beginning of this proof, we recall the standard definition for smooth functions [Boyd and Vandenberghe, 2004].

**Definition 2** A function  $f(\mathbf{x}) : \mathcal{K} \rightarrow \mathbb{R}$  is called  $\alpha$ -smooth over  $\mathcal{K}$  if for all  $\mathbf{x}, \mathbf{y} \in \mathcal{K}$ , it holds that  $f(\mathbf{y}) \leq f(\mathbf{x}) + \langle \nabla f(\mathbf{x}), \mathbf{y} - \mathbf{x} \rangle + \frac{\alpha}{2} \|\mathbf{y} - \mathbf{x}\|_2^2$ .

It is not hard to verify that  $F_t(\mathbf{y})$  is 2-smooth over  $\mathcal{K}$  for any  $t \in [T]$ . This property will be utilized in the following.

For brevity, we define  $h_t = F_{t-1}(\mathbf{y}_t) - F_{t-1}(\mathbf{y}_t^*)$  for  $t = 1, \dots, T+1$  and  $h_t(\mathbf{y}_{t-1}) = F_{t-1}(\mathbf{y}_{t-1}) - F_{t-1}(\mathbf{y}_t^*)$  for  $t = 2, \dots, T+1$ .

For  $t = 1$ , since  $\mathbf{y}_1 = \operatorname{argmin}_{\mathbf{y} \in \mathcal{K}} \|\mathbf{y} - \mathbf{y}_1\|_2^2$ , we have

$$h_1 = F_0(\mathbf{y}_1) - F_0(\mathbf{y}_1^*) = 0 \leq \frac{8D^2}{\sqrt{3}} = \frac{8D^2}{\sqrt{t+2}}. \quad (36)$$

Then, for any  $T+1 \geq t \geq 2$ , we have

$$\begin{aligned} h_t(\mathbf{y}_{t-1}) &= F_{t-1}(\mathbf{y}_{t-1}) - F_{t-1}(\mathbf{y}_t^*) \\ &= F_{t-2}(\mathbf{y}_{t-1}) - F_{t-2}(\mathbf{y}_t^*) + \langle \eta \mathbf{g}_{c_{t-1}}, \mathbf{y}_{t-1} - \mathbf{y}_t^* \rangle \\ &\leq F_{t-2}(\mathbf{y}_{t-1}) - F_{t-2}(\mathbf{y}_{t-1}^*) + \langle \eta \mathbf{g}_{c_{t-1}}, \mathbf{y}_{t-1} - \mathbf{y}_t^* \rangle \\ &\leq h_{t-1} + \eta \|\mathbf{g}_{c_{t-1}}\|_2 \|\mathbf{y}_{t-1} - \mathbf{y}_t^*\|_2 \\ &\leq h_{t-1} + \eta \|\mathbf{g}_{c_{t-1}}\|_2 \|\mathbf{y}_{t-1} - \mathbf{y}_{t-1}^*\|_2 + \eta \|\mathbf{g}_{c_{t-1}}\|_2 \|\mathbf{y}_{t-1}^* - \mathbf{y}_t^*\|_2 \\ &\leq h_{t-1} + \eta G \|\mathbf{y}_{t-1} - \mathbf{y}_{t-1}^*\|_2 + \eta G \|\mathbf{y}_{t-1}^* - \mathbf{y}_t^*\|_2 \end{aligned} \quad (37)$$

where the first inequality is due to  $\mathbf{y}_{t-1}^* = \operatorname{argmin}_{\mathbf{y} \in \mathcal{K}} F_{t-2}(\mathbf{y})$  and the last inequality is due to Assumption 1.

Moreover, for any  $T+1 \geq t \geq 2$ , we note that  $F_{t-2}(\mathbf{x})$  is also 2-strongly convex, which implies that

$$\|\mathbf{y}_{t-1} - \mathbf{y}_{t-1}^*\|_2 \leq \sqrt{F_{t-2}(\mathbf{y}_{t-1}) - F_{t-2}(\mathbf{y}_{t-1}^*)} \leq \sqrt{h_{t-1}} \quad (38)$$

where the first inequality is due to (21).

Similarly, for any  $T+1 \geq t \geq 2$

$$\begin{aligned} \|\mathbf{y}_{t-1}^* - \mathbf{y}_t^*\|_2^2 &\leq F_{t-1}(\mathbf{y}_{t-1}^*) - F_{t-1}(\mathbf{y}_t^*) \\ &= F_{t-2}(\mathbf{y}_{t-1}^*) - F_{t-2}(\mathbf{y}_t^*) + \langle \eta \mathbf{g}_{c_{t-1}}, \mathbf{y}_{t-1}^* - \mathbf{y}_t^* \rangle \\ &\leq \eta \|\mathbf{g}_{c_{t-1}}\|_2 \|\mathbf{y}_{t-1}^* - \mathbf{y}_t^*\|_2 \end{aligned}$$

which implies that

$$\|\mathbf{y}_{t-1}^* - \mathbf{y}_t^*\|_2 \leq \eta \|\mathbf{g}_{c_{t-1}}\|_2 \leq \eta G. \quad (39)$$

By combining (37), (38), and (39), for any  $T+1 \geq t \geq 2$ , we have

$$h_t(\mathbf{y}_{t-1}) \leq h_{t-1} + \eta G \sqrt{h_{t-1}} + \eta^2 G^2. \quad (40)$$

Then, for any  $T + 1 \geq t \geq 2$ , since  $F_{t-1}(\mathbf{y})$  is 2-smooth, we have

$$\begin{aligned} h_t &= F_{t-1}(\mathbf{y}_t) - F_{t-1}(\mathbf{y}_t^*) \\ &= F_{t-1}(\mathbf{y}_{t-1} + \sigma_{t-1}(\mathbf{v}_{t-1} - \mathbf{y}_{t-1})) - F_{t-1}(\mathbf{y}_t^*) \\ &\leq h_t(\mathbf{y}_{t-1}) + \langle \nabla F_{t-1}(\mathbf{y}_{t-1}), \sigma_{t-1}(\mathbf{v}_{t-1} - \mathbf{y}_{t-1}) \rangle + \sigma_{t-1}^2 \|\mathbf{v}_{t-1} - \mathbf{y}_{t-1}\|_2^2. \end{aligned} \quad (41)$$

Moreover, for any  $t \in [T]$ , according to Algorithm 1, we have

$$\sigma_t = \operatorname{argmin}_{\sigma \in [0,1]} \langle \sigma(\mathbf{v}_t - \mathbf{y}_t), \nabla F_t(\mathbf{y}_t) \rangle + \sigma^2 \|\mathbf{v}_t - \mathbf{y}_t\|_2^2. \quad (42)$$

Therefore, for  $t = 2$ , by combining (40) and (41), we have

$$\begin{aligned} h_2 &\leq h_1 + \eta G \sqrt{h_1} + \eta^2 G^2 + \langle \nabla F_1(\mathbf{y}_1), \sigma_1(\mathbf{v}_1 - \mathbf{y}_1) \rangle + \sigma_1^2 \|\mathbf{v}_1 - \mathbf{y}_1\|_2^2 \\ &\leq h_1 + \eta G \sqrt{h_1} + \eta^2 G^2 = \frac{D^2}{2(T+2)^{3/2}} \leq 4D^2 = \frac{8D^2}{\sqrt{t+2}} \end{aligned} \quad (43)$$

where the second inequality is due to (42), and the first equality is due to (36) and  $\eta = \frac{D}{\sqrt{2G(T+2)^{3/4}}}$ .

Then, for any  $t = 3, \dots, T+1$ , by defining  $\sigma'_{t-1} = 2/\sqrt{t+1}$  and assuming  $h_{t-1} \leq \frac{8D^2}{\sqrt{t+1}}$ , we have

$$\begin{aligned} h_t &\leq h_t(\mathbf{y}_{t-1}) + \langle \nabla F_{t-1}(\mathbf{y}_{t-1}), \sigma'_{t-1}(\mathbf{v}_{t-1} - \mathbf{y}_{t-1}) \rangle + (\sigma'_{t-1})^2 \|\mathbf{v}_{t-1} - \mathbf{y}_{t-1}\|_2^2 \\ &\leq h_t(\mathbf{y}_{t-1}) + \langle \nabla F_{t-1}(\mathbf{y}_{t-1}), \sigma'_{t-1}(\mathbf{y}_t^* - \mathbf{y}_{t-1}) \rangle + (\sigma'_{t-1})^2 \|\mathbf{v}_{t-1} - \mathbf{y}_{t-1}\|_2^2 \\ &\leq (1 - \sigma'_{t-1}) h_t(\mathbf{y}_{t-1}) + (\sigma'_{t-1})^2 \|\mathbf{v}_{t-1} - \mathbf{y}_{t-1}\|_2^2 \\ &\leq (1 - \sigma'_{t-1}) (h_{t-1} + \eta G \sqrt{h_{t-1}} + \eta^2 G^2) + (\sigma'_{t-1})^2 D^2 \\ &\leq (1 - \sigma'_{t-1}) h_{t-1} + \eta G \sqrt{h_{t-1}} + \eta^2 G^2 + (\sigma'_{t-1})^2 D^2 \\ &\leq \left(1 - \frac{2}{\sqrt{t+1}}\right) \frac{8D^2}{\sqrt{t+1}} + \frac{2D^2}{(T+2)^{3/4}(t+1)^{1/4}} + \frac{D^2}{2(T+2)^{3/2}} + \frac{4D^2}{t+1} \\ &\leq \left(1 - \frac{2}{\sqrt{t+1}}\right) \frac{8D^2}{\sqrt{t+1}} + \frac{2D^2}{t+1} + \frac{D^2}{2(t+1)} + \frac{4D^2}{t+1} \\ &\leq \left(1 - \frac{2}{\sqrt{t+1}}\right) \frac{8D^2}{\sqrt{t+1}} + \frac{8D^2}{t+1} \\ &= \left(1 - \frac{1}{\sqrt{t+1}}\right) \frac{8D^2}{\sqrt{t+1}} \leq \frac{8D^2}{\sqrt{t+2}} \end{aligned} \quad (44)$$

where the first inequality is due to (41) and (42), the second inequality is due to  $\mathbf{v}_{t-1} \in \operatorname{argmin}_{\mathbf{y} \in \mathcal{K}} \langle \nabla F_{t-1}(\mathbf{y}_{t-1}), \mathbf{y} \rangle$ , the third inequality is due to the convexity of  $F_{t-1}(\mathbf{y})$ , the fourth inequality is due to (40), and the last inequality is due to

$$\left(1 - \frac{1}{\sqrt{t+1}}\right) \frac{1}{\sqrt{t+1}} \leq \frac{1}{\sqrt{t+2}} \quad (45)$$

for any  $t \geq 0$ .

Note that (45) can be derived by dividing  $(t+1)\sqrt{t+2}$  into both sides of the following inequality

$$\sqrt{t+2}\sqrt{t+1} - \sqrt{t+2} \leq (\sqrt{t+1} + 1)\sqrt{t+1} - \sqrt{t+2} \leq t+1 + \sqrt{t+1} - \sqrt{t+2} \leq t+1.$$

By combining (36), (43), and (44), we complete this proof.

### C Proof of Lemma 3

In the beginning, we define  $\mathbf{y}_t^* = \operatorname{argmin}_{\mathbf{y} \in \mathcal{K}} F_{t-1}(\mathbf{y})$  for any  $t \in [T+1]$ , where  $F_t(\mathbf{y}) = \eta \sum_{i=1}^t \langle \mathbf{g}_{c_i}, \mathbf{y} \rangle + \|\mathbf{y} - \mathbf{y}_1\|_2^2$ .

Then, it is easy to verify that

$$\sum_{t=1}^T \langle \mathbf{g}_{c_t}, \mathbf{y}_t - \mathbf{x}^* \rangle = \sum_{t=1}^T \langle \mathbf{g}_{c_t}, \mathbf{y}_t - \mathbf{y}_t^* \rangle + \sum_{t=1}^T \langle \mathbf{g}_{c_t}, \mathbf{y}_t^* - \mathbf{x}^* \rangle. \quad (46)$$

Therefore, we will continue to upper bound the right side of (46). By applying Lemma 2, we have

$$\begin{aligned} \sum_{t=1}^T \langle \mathbf{g}_{c_t}, \mathbf{y}_t - \mathbf{y}_t^* \rangle &\leq \sum_{t=1}^T \|\mathbf{g}_{c_t}\|_2 \|\mathbf{y}_t - \mathbf{y}_t^*\|_2 \leq \sum_{t=1}^T G \sqrt{F_{t-1}(\mathbf{y}_t) - F_{t-1}(\mathbf{y}_t^*)} \\ &\leq \sum_{t=1}^T \frac{2\sqrt{2}GD}{(t+2)^{1/4}} \leq \frac{8\sqrt{2}GD(T+2)^{3/4}}{3} \end{aligned} \quad (47)$$

where the second inequality is due to (21) and Assumption 1, and the last inequality is due to  $\sum_{t=1}^T (t+2)^{-1/4} \leq 4(T+2)^{3/4}/3$ .

Then, to bound  $\sum_{t=1}^T \langle \mathbf{g}_{c_t}, \mathbf{y}_t^* - \mathbf{x}^* \rangle$ , we introduce the following lemma.

**Lemma 9** (Lemma 6.6 of Garber and Hazan [2016]) *Let  $\{f_t(\mathbf{y})\}_{t=1}^T$  be a sequence of loss functions and let  $\mathbf{y}_t^* \in \arg\min_{\mathbf{y} \in \mathcal{K}} \sum_{i=1}^t f_i(\mathbf{y})$  for any  $t \in [T]$ . Then, it holds that*

$$\sum_{t=1}^T f_t(\mathbf{y}_t^*) - \min_{\mathbf{y} \in \mathcal{K}} \sum_{t=1}^T f_t(\mathbf{y}) \leq 0.$$

To apply Lemma 9, we define  $\tilde{f}_1(\mathbf{y}) = \eta \langle \mathbf{g}_{c_1}, \mathbf{y} \rangle + \|\mathbf{y} - \mathbf{y}_1\|_2^2$  and  $\tilde{f}_t(\mathbf{y}) = \eta \langle \mathbf{g}_{c_t}, \mathbf{y} \rangle$  for any  $t \geq 2$ . Note that  $F_t(\mathbf{y}) = \sum_{i=1}^t \tilde{f}_i(\mathbf{y})$  and  $\mathbf{y}_{t+1}^* = \arg\min_{\mathbf{y} \in \mathcal{K}} F_t(\mathbf{y})$  for any  $t = 1, \dots, T$ . Then, by applying Lemma 9 to  $\{\tilde{f}_t(\mathbf{y})\}_{t=1}^T$ , we have

$$\sum_{t=1}^T \tilde{f}_t(\mathbf{y}_{t+1}^*) - \sum_{t=1}^T \tilde{f}_t(\mathbf{x}^*) \leq 0$$

which implies that

$$\eta \sum_{t=1}^T \langle \mathbf{g}_{c_t}, \mathbf{y}_{t+1}^* - \mathbf{x}^* \rangle \leq \|\mathbf{x}^* - \mathbf{y}_1\|_2^2 - \|\mathbf{y}_2^* - \mathbf{y}_1\|_2^2.$$

According to Assumption 2, we have

$$\sum_{t=1}^T \langle \mathbf{g}_{c_t}, \mathbf{y}_{t+1}^* - \mathbf{x}^* \rangle \leq \frac{1}{\eta} \|\mathbf{x}^* - \mathbf{y}_1\|_2^2 \leq \frac{D^2}{\eta}.$$

Then, we have

$$\begin{aligned} \sum_{t=1}^T \langle \mathbf{g}_{c_t}, \mathbf{y}_t^* - \mathbf{x}^* \rangle &= \sum_{t=1}^T \langle \mathbf{g}_{c_t}, \mathbf{y}_{t+1}^* - \mathbf{x}^* \rangle + \sum_{t=1}^T \langle \mathbf{g}_{c_t}, \mathbf{y}_t^* - \mathbf{y}_{t+1}^* \rangle \\ &\leq \frac{D^2}{\eta} + \sum_{t=1}^T \|\mathbf{g}_{c_t}\|_2 \|\mathbf{y}_t^* - \mathbf{y}_{t+1}^*\|_2 \\ &\leq \frac{D^2}{\eta} + \eta TG^2 \\ &\leq \sqrt{2}GD(T+2)^{3/4} + \frac{GDT^{1/4}}{\sqrt{2}} \end{aligned} \quad (48)$$

where the second inequality is due to (39) and Assumption 1, and the last inequality is due to  $\eta = \frac{D}{\sqrt{2}G(T+2)^{3/4}}$ .

By substituting (47) and (48) into (46), we complete the proof.

## D Proof of Lemma 4

We first consider the term  $E = \sum_{t=1}^T \frac{3\beta D}{2} \|\mathbf{y}_t - \mathbf{y}_{\tau_t}\|_2$ . If  $T \leq 2d$ , it is easy to verify that

$$E = \sum_{t=1}^T \frac{3\beta D}{2} \|\mathbf{y}_t - \mathbf{y}_{\tau_t}\|_2 \leq \frac{3\beta TD^2}{2} \leq 3\beta dD^2 \quad (49)$$

where the first inequality is due to Assumption 2.

Then, if  $T > 2d$ , we have

$$\begin{aligned} E &= \frac{3\beta D}{2} \sum_{t=1}^{2d} \|\mathbf{y}_t - \mathbf{y}_{\tau_t}\|_2 + \frac{3\beta D}{2} \sum_{t=2d+1}^T \|\mathbf{y}_t - \mathbf{y}_{\tau_t}\|_2 \\ &\leq 3\beta d D^2 + \frac{3\beta D}{2} \sum_{t=2d+1}^T (\|\mathbf{y}_t - \mathbf{y}_t^*\|_2 + \|\mathbf{y}_t^* - \mathbf{y}_{\tau_t}^*\|_2 + \|\mathbf{y}_{\tau_t}^* - \mathbf{y}_{\tau_t}\|_2). \end{aligned} \quad (50)$$

Because  $F_{t-1}(\mathbf{y})$  is  $(t-1)\beta$ -strongly convex for any  $t = 2, \dots, T+1$ , we have

$$\|\mathbf{y}_t - \mathbf{y}_t^*\|_2 \leq \sqrt{\frac{2(F_{t-1}(\mathbf{y}_t) - F_{t-1}(\mathbf{y}_t^*))}{(t-1)\beta}} \leq \sqrt{\frac{2\gamma}{(t-1)^{1-\alpha}\beta}} \quad (51)$$

where the first inequality is due to (21) and the second inequality is due to  $F_{t-1}(\mathbf{y}_t) - F_{t-1}(\mathbf{y}_t^*) \leq \gamma(t-1)^\alpha$ .

Before considering  $\|\mathbf{y}_t^* - \mathbf{y}_{\tau_t}^*\|_2$ , we define  $\tilde{f}_t(\mathbf{y}) = \langle \mathbf{g}_{c_t}, \mathbf{y} \rangle + \frac{\beta}{2} \|\mathbf{y} - \mathbf{y}_t\|_2^2$  for any  $t = 1, \dots, T$ . Note that  $F_t(\mathbf{y}) = \sum_{i=1}^t \tilde{f}_i(\mathbf{y})$ . Moreover, for any  $\mathbf{x}, \mathbf{y} \in \mathcal{K}$  and  $t = 1, \dots, T$ , we have

$$\begin{aligned} |\tilde{f}_t(\mathbf{x}) - \tilde{f}_t(\mathbf{y})| &= \left| \langle \mathbf{g}_{c_t}, \mathbf{x} - \mathbf{y} \rangle + \frac{\beta}{2} \|\mathbf{x} - \mathbf{y}_t\|_2^2 - \frac{\beta}{2} \|\mathbf{y} - \mathbf{y}_t\|_2^2 \right| \\ &= \left| \langle \mathbf{g}_{c_t}, \mathbf{x} - \mathbf{y} \rangle + \frac{\beta}{2} \langle \mathbf{x} - \mathbf{y}_t + \mathbf{y} - \mathbf{y}_t, \mathbf{x} - \mathbf{y} \rangle \right| \\ &\leq \|\mathbf{g}_{c_t}\|_2 \|\mathbf{x} - \mathbf{y}\|_2 + \frac{\beta}{2} (\|\mathbf{x} - \mathbf{y}_t\|_2 + \|\mathbf{y} - \mathbf{y}_t\|_2) \|\mathbf{x} - \mathbf{y}\|_2 \\ &\leq (G + \beta D) \|\mathbf{x} - \mathbf{y}\|_2 \end{aligned} \quad (52)$$

where the last inequality is due to Assumptions 1 and 2.

Because of (21), for any  $i \geq j > 1$ , we have

$$\begin{aligned} \|\mathbf{y}_j^* - \mathbf{y}_i^*\|_2^2 &\leq \frac{2(F_{i-1}(\mathbf{y}_j^*) - F_{i-1}(\mathbf{y}_i^*))}{(i-1)\beta} \\ &= \frac{2(F_{j-1}(\mathbf{y}_j^*) - F_{j-1}(\mathbf{y}_i^*)) + 2\sum_{k=j}^{i-1} (\tilde{f}_k(\mathbf{y}_j^*) - \tilde{f}_k(\mathbf{y}_i^*))}{(i-1)\beta} \\ &\leq \frac{2(i-j)(G + \beta D) \|\mathbf{y}_j^* - \mathbf{y}_i^*\|_2}{(i-1)\beta} \end{aligned} \quad (53)$$

where the last inequality is due to  $\mathbf{y}_j^* = \operatorname{argmin}_{\mathbf{y} \in \mathcal{K}} F_{j-1}(\mathbf{y})$  and (52).

Note that all gradients queried at rounds  $1, \dots, t-d$  must arrive before round  $t$ . Therefore, for any  $t \geq 2d+1$ , we have  $\tau_t = 1 + \sum_{k=1}^{t-1} |\mathcal{F}_k| \geq t-d+1 > t-d$  and

$$\|\mathbf{y}_t^* - \mathbf{y}_{\tau_t}^*\|_2 \leq \frac{2(t-\tau_t)(G + \beta D)}{(t-1)\beta} \leq \frac{2d(G + \beta D)}{(t-1)\beta} \quad (54)$$

where the first inequality is due to  $t \geq \tau_t > 1$  and (53).

By combining (50) with (51) and (54), if  $T > 2d$ , we have

$$\begin{aligned} E &\leq 3\beta d D^2 + \frac{3\beta D}{2} \sum_{t=2d+1}^T \left( \sqrt{\frac{2\gamma}{(t-1)^{1-\alpha}\beta}} + \frac{2d(G + \beta D)}{(t-1)\beta} + \sqrt{\frac{2\gamma}{(\tau_t-1)^{1-\alpha}\beta}} \right) \\ &\leq 3\beta d D^2 + 3\beta D \sum_{t=2d+1}^T \sqrt{\frac{2\gamma}{(\tau_t-1)^{1-\alpha}\beta}} + 3D(G + \beta D)d \sum_{t=2}^T \frac{1}{t} \\ &\leq 3\beta d D^2 + 3\beta D \sum_{t=2d+1}^T \sqrt{\frac{2\gamma}{(\tau_t-1)^{1-\alpha}\beta}} + 3D(G + \beta D)d \ln T \\ &\leq 3\beta d D^2 + 3dD\sqrt{2\beta\gamma} + \frac{6D\sqrt{2\beta\gamma}}{1+\alpha} T^{(1+\alpha)/2} + 3D(G + \beta D)d \ln T \end{aligned}$$

where the second inequality is due to  $(\tau_t - 1)^{1-\alpha} \leq (t - 1)^{1-\alpha}$  for  $t \geq \tau_t > 1$  and  $\alpha < 1$ , and the last inequality is due to Lemma 7 and  $0 < 1 - \alpha \leq 1$ .

By combining (49) with the above inequality, we have

$$E \leq 3\beta dD^2 + 3dD\sqrt{2\beta\gamma} + \frac{6D\sqrt{2\beta\gamma}}{1+\alpha}T^{(1+\alpha)/2} + 3D(G + \beta D)d \ln T.$$

Then, we proceed to bound the term  $C = \sum_{t=s}^{T+d-1} \sum_{i=\tau_t}^{\tau_{t+1}-1} G\|\mathbf{y}_{\tau_t} - \mathbf{y}_i\|_2$ . Similar to (31), we first have

$$C \leq |\mathcal{F}_s|GD + \sum_{t=s+1}^{T+d-1} \sum_{i=\tau_t}^{\tau_{t+1}-1} G(\|\mathbf{y}_{\tau_t} - \mathbf{y}_{\tau_t}^*\|_2 + \|\mathbf{y}_{\tau_t}^* - \mathbf{y}_i^*\|_2 + \|\mathbf{y}_i^* - \mathbf{y}_i\|_2). \quad (55)$$

By combining (55) with  $|\mathcal{F}_s| \leq d$ , (51), and (53), we have

$$\begin{aligned} C &\leq dGD + \sum_{t=s+1}^{T+d-1} \sum_{i=\tau_t}^{\tau_{t+1}-1} G \left( \sqrt{\frac{2\gamma}{(\tau_t - 1)^{1-\alpha}\beta}} + \frac{2(i - \tau_t)(G + \beta D)}{(i - 1)\beta} + \sqrt{\frac{2\gamma}{(i - 1)^{1-\alpha}\beta}} \right) \\ &\leq dGD + \sum_{t=s+1}^{T+d-1} \sum_{i=\tau_t}^{\tau_{t+1}-1} G \left( 2\sqrt{\frac{2\gamma}{(\tau_t - 1)^{1-\alpha}\beta}} + \frac{2(i - \tau_t)(G + \beta D)}{(i - 1)\beta} \right) \\ &\leq dGD + 2dG\sqrt{\frac{2\gamma}{\beta}} + \sqrt{\frac{2\gamma}{\beta}} \frac{4G}{1+\alpha} T^{(1+\alpha)/2} + \sum_{t=s+1}^{T+d-1} \sum_{i=\tau_t}^{\tau_{t+1}-1} \frac{2dG(G + \beta D)}{(i - 1)\beta} \end{aligned} \quad (56)$$

where the first inequality is due to  $(\tau_t - 1)^{1-\alpha} \leq (i - 1)^{1-\alpha}$  for  $0 < \tau_t - 1 \leq i - 1$  and  $\alpha < 1$ , and the last inequality is due to Lemma 8,  $0 < 1 - \alpha \leq 1$ , and  $i - \tau_t \leq \tau_{t+1} - 1 - \tau_t \leq |\mathcal{F}_t| \leq d$ .

Recall that we have defined

$$\mathcal{I}_t = \begin{cases} \emptyset, & \text{if } |\mathcal{F}_t| = 0, \\ \{\tau_t, \tau_t + 1, \dots, \tau_{t+1} - 1\}, & \text{otherwise.} \end{cases}$$

It is not hard to verify that

$$\cup_{t=s+1}^{T+d-1} \mathcal{I}_t = \{|\mathcal{F}_s| + 1, \dots, T\}, \mathcal{I}_i \cap \mathcal{I}_j = \emptyset, \forall i \neq j. \quad (57)$$

By combining (57) with (56), we have

$$\begin{aligned} C &\leq dGD + 2dG\sqrt{\frac{2\gamma}{\beta}} + \sqrt{\frac{2\gamma}{\beta}} \frac{4G}{1+\alpha} T^{(1+\alpha)/2} + \sum_{t=|\mathcal{F}_s|+1}^T \frac{2dG(G + \beta D)}{(t - 1)\beta} \\ &\leq dGD + 2dG\sqrt{\frac{2\gamma}{\beta}} + \sqrt{\frac{2\gamma}{\beta}} \frac{4G}{1+\alpha} T^{(1+\alpha)/2} + \sum_{t=2}^T \frac{2dG(G + \beta D)}{(t - 1)\beta} \\ &\leq dGD + 2dG\sqrt{\frac{2\gamma}{\beta}} + \sqrt{\frac{2\gamma}{\beta}} \frac{4G}{1+\alpha} T^{(1+\alpha)/2} + \frac{2dG(G + \beta D)(1 + \ln T)}{\beta}. \end{aligned} \quad (58)$$

Next, we proceed to bound the term  $A = \sum_{t=1}^T G\|\mathbf{y}_{\tau_t} - \mathbf{y}_{\tau_{t'}}\|_2$ . Similar to (23), if  $T > 2d$ , we have

$$\begin{aligned} A &\leq 2dGD + \sum_{t=2d+1}^T G(\|\mathbf{y}_{\tau_t} - \mathbf{y}_{\tau_t}^*\|_2 + \|\mathbf{y}_{\tau_t}^* - \mathbf{y}_{\tau_{t'}}^*\|_2 + \|\mathbf{y}_{\tau_{t'}}^* - \mathbf{y}_{\tau_{t'}}\|_2) \\ &\leq 2dGD + \sum_{t=2d+1}^T G \left( \sqrt{\frac{2\gamma}{(\tau_t - 1)^{1-\alpha}\beta}} + \frac{2(\tau_{t'} - \tau_t)(G + \beta D)}{(\tau_{t'} - 1)\beta} + \sqrt{\frac{2\gamma}{(\tau_{t'} - 1)^{1-\alpha}\beta}} \right) \\ &\leq 2dGD + \sum_{t=2d+1}^T 2G\sqrt{\frac{2\gamma}{(\tau_t - 1)^{1-\alpha}\beta}} + \sum_{t=2d+1}^T \frac{2G(G + \beta D)}{\beta} \sum_{k=t}^{t'-1} \frac{|\mathcal{F}_k|}{\sum_{i=1}^k |\mathcal{F}_i|} \end{aligned} \quad (59)$$

where the second inequality is due to (51) and (53), and the last inequality is due to  $\tau_{t'} \geq \tau_t > 1$  and

$$\frac{(\tau_{t'} - \tau_t)}{(\tau_{t'} - 1)} = \frac{\sum_{k=t}^{t'-1} |\mathcal{F}_k|}{\sum_{k=1}^{t'-1} |\mathcal{F}_k|} \leq \sum_{k=t}^{t'-1} \frac{|\mathcal{F}_k|}{\sum_{i=1}^k |\mathcal{F}_i|}.$$

Then, we introduce the following lemma.

**Lemma 10** Let  $h_k = \sum_{i=1}^k |\mathcal{F}_i|$ . If  $T > 2d$ , we have

$$\sum_{t=2d+1}^T \sum_{k=t}^{t'-1} \frac{|\mathcal{F}_k|}{h_k} \leq d + d \ln T.$$

By applying Lemmas 7 and 10 to (59) and combining with (22), we have

$$A \leq 2dGD + 2dG\sqrt{\frac{2\gamma}{\beta}} + \sqrt{\frac{2\gamma}{\beta}} \frac{4G}{1+\alpha} T^{(1+\alpha)/2} + \frac{2G(G+\beta D)d(1+\ln T)}{\beta}. \quad (60)$$

Finally, by combining (58) and (60), we complete this proof.

## E Proof of Lemmas 5 and 6

Recall that  $F_\tau(\mathbf{y})$  defined in Algorithm 2 is equivalent to that defined in (12). Let  $\tilde{f}_t(\mathbf{y}) = \langle \mathbf{g}_{c_t}, \mathbf{y} \rangle + \frac{\beta}{2} \|\mathbf{y} - \mathbf{y}_t\|_2^2$  for any  $t = 1, \dots, T$ , which is  $\beta$ -strongly convex. Moreover, as proved in (52), functions  $\tilde{f}_1(\mathbf{y}), \dots, \tilde{f}_T(\mathbf{y})$  are  $(G + \beta D)$ -Lipschitz over  $\mathcal{K}$  (see the definition of Lipschitz functions in Hazan [2016]). Then, because of  $\nabla \tilde{f}_t(\mathbf{y}_t) = \mathbf{g}_{c_t}$ , it is not hard to verify that decisions  $\mathbf{y}_1, \dots, \mathbf{y}_{T+1}$  in our Algorithm 2 are actually generated by performing OFW for strongly convex losses (see Algorithm 2 in Wan and Zhang [2021] for details) on functions  $\tilde{f}_1(\mathbf{y}), \dots, \tilde{f}_T(\mathbf{y})$ . Note that when Assumption 2 holds, and functions  $\tilde{f}_1(\mathbf{y}), \dots, \tilde{f}_T(\mathbf{y})$  are  $\beta$ -strongly convex and  $G'$ -Lipschitz, Lemma 6 of Wan and Zhang [2021] has already shown that

$$F_{t-1}(\mathbf{y}_t) - F_{t-1}(\mathbf{y}_t^*) \leq \frac{16(G' + \beta D)^2(t-1)^{1/3}}{\beta}$$

for any  $t = 2, \dots, T+1$ . Therefore, our Lemma 5 can be derived by simply substituting  $G' = G + \beta D$  into the above inequality.

Moreover, when Assumption 2 holds, and functions  $\tilde{f}_1(\mathbf{y}), \dots, \tilde{f}_T(\mathbf{y})$  are  $\beta$ -strongly convex and  $G'$ -Lipschitz, Theorem 3 of Wan and Zhang [2021] has already shown that

$$\sum_{t=1}^T \tilde{f}_t(\mathbf{y}_t) - \sum_{t=1}^T \tilde{f}_t(\mathbf{x}^*) \leq \frac{6\sqrt{2}(G' + \beta D)^2 T^{2/3}}{\beta} + \frac{2(G' + \beta D)^2 \ln T}{\beta} + G'D.$$

We notice that  $\sum_{t=1}^T (\langle \mathbf{g}_{c_t}, \mathbf{y}_t - \mathbf{x}^* \rangle - \frac{\beta}{2} \|\mathbf{y}_t - \mathbf{x}^*\|_2^2) = \sum_{t=1}^T \tilde{f}_t(\mathbf{y}_t) - \sum_{t=1}^T \tilde{f}_t(\mathbf{x}^*)$ . Therefore, our Lemma 6 can be derived by simply substituting  $G' = G + \beta D$  into the above inequality.

## F Proof of Lemma 7

Since the gradient  $\mathbf{g}_1$  must arrive before round  $d + 1$ , for any  $T \geq t \geq 2d + 1$ , it is easy to verify that  $\tau_t = 1 + \sum_{i=1}^{t-1} |\mathcal{F}_i| \geq 1 + \sum_{i=1}^{d+1} |\mathcal{F}_i| \geq 2$ . Moreover, for any  $i \geq 2$  and  $(i+1)d \geq t \geq id + 1$ , since all gradients queried at rounds  $1, \dots, (i-1)d + 1$  must arrive before round  $id + 1$ , we have

$$\tau_t = 1 + \sum_{i=1}^{t-1} |\mathcal{F}_i| \geq (i-1)d + 2. \quad (61)$$

Then, we have

$$\begin{aligned} \sum_{t=2d+1}^T (\tau_t - 1)^{-\alpha/2} &= \sum_{t=2d+1}^{\lfloor T/d \rfloor d} (\tau_t - 1)^{-\alpha/2} + \sum_{t=\lfloor T/d \rfloor d + 1}^T (\tau_t - 1)^{-\alpha/2} \\ &\leq \sum_{i=2}^{\lfloor T/d \rfloor - 1} \sum_{t=id+1}^{(i+1)d} (\tau_t - 1)^{-\alpha/2} + d \leq d + \sum_{i=2}^{\lfloor T/d \rfloor - 1} d((i-1)d + 1)^{-\alpha/2} \\ &\leq d + \sum_{i=2}^{\lfloor T/d \rfloor - 1} d^{1-\alpha/2} (i-1)^{-\alpha/2} \leq d + \sum_{i=1}^{\lfloor T/d \rfloor} d^{1-\alpha/2} i^{-\alpha/2} \\ &\leq d + \frac{2}{2-\alpha} d^{1-\alpha/2} (\lfloor T/d \rfloor)^{1-\alpha/2} \leq d + \frac{2}{2-\alpha} T^{1-\alpha/2} \end{aligned}$$

where the first inequality is due to  $(\tau_t - 1)^{-\alpha/2} \leq 1$  for  $\alpha > 0$  and  $\tau_t \geq 2$ , and the second inequality is due to (61) and  $\alpha > 0$ .

## G Proof of Lemma 8

Because of  $\tau_t = 1 + \sum_{i=1}^{t-1} |\mathcal{F}_i|$ , we have

$$\begin{aligned}
& \sum_{t=s+1}^{T+d-1} \sum_{i=\tau_t}^{\tau_{t+1}-1} (\tau_t - 1)^{-\alpha/2} \\
&= \sum_{t=s+1}^{T+d-1} \frac{|\mathcal{F}_t|}{(\sum_{i=s}^{t-1} |\mathcal{F}_i|)^{\alpha/2}} \\
&= \sum_{t=s+1}^{T+d-1} \frac{|\mathcal{F}_t|}{(\sum_{i=s}^t |\mathcal{F}_i|)^{\alpha/2}} + \sum_{t=s+1}^{T+d-1} |\mathcal{F}_t| \left( \frac{1}{(\sum_{i=s}^{t-1} |\mathcal{F}_i|)^{\alpha/2}} - \frac{1}{(\sum_{i=s}^t |\mathcal{F}_i|)^{\alpha/2}} \right) \quad (62) \\
&\leq \sum_{t=s+1}^{T+d-1} \frac{|\mathcal{F}_t|}{(\sum_{i=s}^t |\mathcal{F}_i|)^{\alpha/2}} + \sum_{t=s+1}^{T+d-1} d \left( \frac{1}{(\sum_{i=s}^{t-1} |\mathcal{F}_i|)^{\alpha/2}} - \frac{1}{(\sum_{i=s}^t |\mathcal{F}_i|)^{\alpha/2}} \right) \\
&\leq \sum_{t=s+1}^{T+d-1} \frac{|\mathcal{F}_t|}{(\sum_{i=s}^t |\mathcal{F}_i|)^{\alpha/2}} + \frac{d}{|\mathcal{F}_s|^{\alpha/2}} \leq \sum_{t=s+1}^{T+d-1} \frac{|\mathcal{F}_t|}{(\sum_{i=s}^t |\mathcal{F}_i|)^{\alpha/2}} + d
\end{aligned}$$

where the first inequality is due to (32) and  $(\sum_{i=s}^{t-1} |\mathcal{F}_i|)^{\alpha/2} \leq (\sum_{i=s}^t |\mathcal{F}_i|)^{\alpha/2}$ .

Let  $h_t = \sum_{i=s}^t |\mathcal{F}_i|$  for any  $t = s, \dots, T + d - 1$ . Since  $0 < \alpha \leq 1$ , it is not hard to verify that

$$\begin{aligned}
\sum_{t=s+1}^{T+d-1} \frac{|\mathcal{F}_t|}{(\sum_{i=s}^t |\mathcal{F}_i|)^{\alpha/2}} &= \sum_{t=s+1}^{T+d-1} \frac{|\mathcal{F}_t|}{(h_t)^{\alpha/2}} = \sum_{t=s+1}^{T+d-1} \int_{h_{t-1}}^{h_t} \frac{1}{(h_t)^{\alpha/2}} dx \\
&\leq \sum_{t=s+1}^{T+d-1} \int_{h_{t-1}}^{h_t} \frac{1}{x^{\alpha/2}} dx = \int_{h_s}^{h_{T+d-1}} \frac{1}{x^{\alpha/2}} dx = \int_{|\mathcal{F}_s|}^T \frac{1}{x^{\alpha/2}} dx \quad (63) \\
&\leq \frac{2}{2-\alpha} T^{1-\alpha/2}.
\end{aligned}$$

Finally, we complete this proof by combining (62) with (63).

## H Proof of Lemma 10

It is not hard to verify that

$$\begin{aligned}
\sum_{t=2d+1}^T \sum_{k=t}^{t'-1} \frac{|\mathcal{F}_k|}{h_k} &\leq \sum_{t=s}^T \sum_{k=t}^{t'-1} \frac{|\mathcal{F}_k|}{h_k} \leq \sum_{t=s}^T \sum_{k=t}^{t+d-1} \frac{|\mathcal{F}_k|}{h_k} = \sum_{k=0}^{d-1} \sum_{t=s+k}^{T+k} \frac{|\mathcal{F}_t|}{h_t} \\
&\leq \sum_{k=0}^{d-1} \sum_{t=s}^{T+d-1} \frac{|\mathcal{F}_t|}{h_t} = d \sum_{t=s}^{T+d-1} \frac{|\mathcal{F}_t|}{h_t}
\end{aligned}$$

where the first inequality is due to  $s \leq d < 2d + 1$ , and the second inequality is due to  $t' - 1 = t + d_t - 2 < t + d - 1$ .

Moreover, we have

$$\begin{aligned}
\sum_{t=s}^{T+d-1} \frac{|\mathcal{F}_t|}{h_t} &= \frac{|\mathcal{F}_s|}{h_s} + \sum_{t=s+1}^{T+d-1} \int_{h_{t-1}}^{h_t} \frac{1}{h_t} dx \leq \frac{|\mathcal{F}_s|}{h_s} + \sum_{t=s+1}^{T+d-1} \int_{h_{t-1}}^{h_t} \frac{1}{x} dx \\
&= \frac{|\mathcal{F}_s|}{h_s} + \int_{h_s}^{h_{T+d-1}} \frac{1}{x} dx = 1 + \ln \frac{T}{|\mathcal{F}_s|} \leq 1 + \ln T
\end{aligned}$$

where the last equality is due to  $h_s = |\mathcal{F}_s|$  and  $h_{T+d-1} = T$ .

Finally, we complete this proof by combining the above two inequalities.
